# Supplementary material for: Spironolactone Use and Improved Outcomes in Patients With Heart Failure With Preserved Ejection Fraction With Resistant Hypertension
Source: PubMed Central journal article supplement — J Am Heart Assoc. 2020 Nov 23;9(23):e018827. doi: 10.1161/JAHA.120.018827 (PMC7763779; doi:10.1161/jaha.120.018827), 2020-11-23
Supplement: JAH3-9-e018827-s001.pdf [file JAH3-9-e018827-s001.pdf]

# **SUPPLEMENTAL MATERIAL**

**Table S1. Primary and secondary outcomes in HFpEF patients with or without traditional resistant hypertension\*.**

| Event                                          | Resistant hypertension (+) |                         |              | Resistant hypertension (-) |                           |         |
|------------------------------------------------|----------------------------|-------------------------|--------------|----------------------------|---------------------------|---------|
|                                                | Placebo<br>n = 457         | Spirolactone<br>n = 451 | P value      | Placebo<br>n = 1,263       | Spirolactone<br>n = 1,270 | P value |
| <b>Primary outcome events<sup>†</sup></b>      |                            |                         |              |                            |                           |         |
| No. of patients                                | 117                        | 82                      |              | 231                        | 238                       |         |
| Event rate (per 1,000 person-year)             | 88.9                       | 57.5                    |              | 59.3                       | 59.1                      |         |
| HR (95% CI)                                    | 1.00 (ref)                 | <b>0.66 (0.50–0.88)</b> | <b>0.004</b> | 1.00 (ref)                 | 1.01 (0.84–1.21)          | 0.90    |
| <b>All-cause death</b>                         |                            |                         |              |                            |                           |         |
| No. of patients                                | 73                         | 42                      |              | 200                        | 214                       |         |
| Event rate (per 1,000 person-year)             | 48.5                       | 27.1                    |              | 46.9                       | 50.2                      |         |
| HR (95% CI)                                    | 1.00 (ref)                 | <b>0.56 (0.38–0.82)</b> | <b>0.002</b> | 1.00 (ref)                 | 1.07 (0.88–1.30)          | 0.47    |
| <b>Cardiovascular death</b>                    |                            |                         |              |                            |                           |         |
| No. of patients                                | 44                         | 24                      |              | 132                        | 136                       |         |
| Event rate (per 1,000 person-year)             | 29.2                       | 15.5                    |              | 30.9                       | 31.9                      |         |
| HR (95% CI)                                    | 1.00 (ref)                 | <b>0.53 (0.32–0.87)</b> | <b>0.01</b>  | 1.00 (ref)                 | 1.03 (0.81–1.31)          | 0.78    |
| <b>Non-cardiovascular death</b>                |                            |                         |              |                            |                           |         |
| No. of patients                                | 29                         | 18                      |              | 68                         | 78                        |         |
| Event rate (per 1,000 person-year)             | 19.3                       | 11.6                    |              | 15.9                       | 18.3                      |         |
| HR (95% CI)                                    | 1.00 (ref)                 | 0.60 (0.33–1.09)        | 0.09         | 1.00 (ref)                 | 1.15 (0.83–1.59)          | 0.40    |
| <b>Hospitalization for heart failure</b>       |                            |                         |              |                            |                           |         |
| No. of patients                                | 94                         | 70                      |              | 151                        | 136                       |         |
| Event rate (per 1,000 person-year)             | 71.2                       | 49.1                    |              | 37.6                       | 33.8                      |         |
| HR (95% CI)                                    | 1.00 (ref)                 | <b>0.71 (0.52–0.96)</b> | <b>0.02</b>  | 1.00 (ref)                 | 0.89 (0.71–1.13)          | 0.34    |
| <b>Major cardiovascular events<sup>‡</sup></b> |                            |                         |              |                            |                           |         |
| No. of patients                                | 68                         | 48                      |              | 196                        | 193                       |         |
| Event rate (per 1,000 person-year)             | 46.9                       | 31.8                    |              | 47.3                       | 46.3                      |         |
| HR (95% CI)                                    | 1.00 (ref)                 | <b>0.68 (0.47–0.99)</b> | <b>0.04</b>  | 1.00 (ref)                 | 0.98 (0.80–1.19)          | 0.83    |
| <b>Myocardial infarction</b>                   |                            |                         |              |                            |                           |         |
| No. of patients                                | 18                         | 18                      |              | 46                         | 47                        |         |
| Event rate (per 1,000 person-year)             | 12.3                       | 11.8                    |              | 11.0                       | 11.3                      |         |

|                                    |            |                  |      |            |                  |      |
|------------------------------------|------------|------------------|------|------------|------------------|------|
| HR (95% CI)                        | 1.00 (ref) | 0.98 (0.51–1.88) | 0.94 | 1.00 (ref) | 1.02 (0.68–1.53) | 0.92 |
| <b>Stroke</b>                      |            |                  |      |            |                  |      |
| No. of patients                    | 13         | 16               |      | 47         | 41               |      |
| Event rate (per 1,000 person-year) | 8.8        | 10.5             |      | 11.2       | 9.8              |      |
| HR (95% CI)                        | 1.00 (ref) | 1.22 (0.59–2.54) | 0.59 | 1.00 (ref) | 0.87 (0.57–1.32) | 0.50 |

\*Data are presented as number or hazard ratio (95% confidence interval). Bold font denotes significance.

†The primary outcome was a composite of cardiovascular death, aborted cardiac arrest, nonfatal myocardial infarction, nonfatal stroke, or hospitalization for the management of heart failure.

‡Major cardiovascular events included cardiovascular death, nonfatal myocardial infarction, and nonfatal stroke.

HFpEF, heart failure with preserved left ventricular ejection fraction; HR, hazard ratio; CI, confidence interval.

**Table S2. Primary and secondary outcomes in HFpEF patients with uncontrolled blood pressure despite the concurrent use of an angiotensin-converting enzyme inhibitor/angiotensin receptor blocker, a calcium channel blocker, and a diuretic\*.**

|                                                | Placebo<br>n = 353 | Spirolactone<br>n = 343 | P value     |
|------------------------------------------------|--------------------|-------------------------|-------------|
| <b>Event</b>                                   |                    |                         |             |
| <b>Primary outcome events<sup>†</sup></b>      |                    |                         |             |
| No. of patients                                | 70                 | 49                      |             |
| Event rate (per 1,000 person-year)             | 63.9               | 43.1                    |             |
| HR (95% CI)                                    | 1.00 (ref)         | <b>0.68 (0.47–0.98)</b> | <b>0.04</b> |
| <b>All-cause death</b>                         |                    |                         |             |
| No. of patients                                | 38                 | 27                      |             |
| Event rate (per 1,000 person-year)             | 31.3               | 22.6                    |             |
| HR (95% CI)                                    | 1.00 (ref)         | 0.72 (0.44–1.18)        | 0.19        |
| <b>Cardiovascular death</b>                    |                    |                         |             |
| No. of patients                                | 26                 | 17                      |             |
| Event rate (per 1,000 person-year)             | 21.4               | 14.2                    |             |
| HR (95% CI)                                    | 1.00 (ref)         | 0.66 (0.36–1.22)        | 0.18        |
| <b>Non-cardiovascular death</b>                |                    |                         |             |
| No. of patients                                | 12                 | 10                      |             |
| Event rate (per 1,000 person-year)             | 9.9                | 8.4                     |             |
| HR (95% CI)                                    | 1.00 (ref)         | 0.84 (0.36–1.96)        | 0.69        |
| <b>Hospitalization for heart failure</b>       |                    |                         |             |
| No. of patients                                | 57                 | 36                      |             |
| Event rate (per 1,000 person-year)             | 52.0               | 31.6                    |             |
| HR (95% CI)                                    | 1.00 (ref)         | <b>0.62 (0.41–0.94)</b> | <b>0.02</b> |
| <b>Major cardiovascular events<sup>‡</sup></b> |                    |                         |             |
| No. of patients                                | 38                 | 35                      |             |
| Event rate (per 1,000 person-year)             | 31.9               | 30.2                    |             |
| HR (95% CI)                                    | 1.00 (ref)         | 0.95 (0.60–1.50)        | 0.81        |
| <b>Myocardial infarction</b>                   |                    |                         |             |
| No. of patients                                | 8                  | 13                      |             |

|                                    |            |                  |      |
|------------------------------------|------------|------------------|------|
| Event rate (per 1,000 person-year) | 6.7        | 11.1             |      |
| HR (95% CI)                        | 1.00 (ref) | 1.68 (0.69–4.05) | 0.25 |
| <b>Stroke</b>                      |            |                  |      |
| No. of patients                    | 9          | 10               |      |
| Event rate (per 1,000 person-year) | 7.5        | 8.5              |      |
| HR (95% CI)                        | 1.00 (ref) | 1.14 (0.46–2.80) | 0.78 |

\*Data are presented as number or hazard ratio (95% confidence interval). Uncontrolled blood pressure was defined as systolic blood pressure  $\geq 130$  mm Hg and/or diastolic blood pressure  $\geq 80$  mm Hg. Bold font denotes significance.

<sup>†</sup>The primary outcome was a composite of cardiovascular death, aborted cardiac arrest, nonfatal myocardial infarction, nonfatal stroke, or hospitalization for the management of heart failure.

<sup>‡</sup>Major cardiovascular events included cardiovascular death, nonfatal myocardial infarction, and nonfatal stroke. HFpEF, heart failure with preserved left ventricular ejection fraction; HR, hazard ratio; CI, confidence interval.

**Table S3. Primary and secondary outcomes in HFpEF patients from the Americas with or without resistant hypertension\*.**

| Event                                          | Resistant hypertension (+) |                         |              | Resistant hypertension (-) |                  |         |
|------------------------------------------------|----------------------------|-------------------------|--------------|----------------------------|------------------|---------|
|                                                | Placebo<br>n = 284         | Spiro<br>n = 270        | P value      | Placebo<br>n = 595         | Spiro<br>n = 615 | P value |
| <b>Primary outcome events<sup>†</sup></b>      |                            |                         |              |                            |                  |         |
| No. of patients                                | 105                        | 73                      |              | 175                        | 169              |         |
| Event rate (per 1,000 person-year)             | 156.0                      | 102.4                   |              | 112.6                      | 103.0            |         |
| HR (95% CI)                                    | 1.00 (ref)                 | <b>0.66 (0.48–0.89)</b> | <b>0.006</b> | 1.00 (ref)                 | 0.92 (0.74–1.13) | 0.50    |
| <b>All-cause death</b>                         |                            |                         |              |                            |                  |         |
| No. of patients                                | 66                         | 35                      |              | 139                        | 146              |         |
| Event rate (per 1,000 person-year)             | 78.7                       | 42.5                    |              | 78.9                       | 79.4             |         |
| HR (95% CI)                                    | 1.00 (ref)                 | <b>0.53 (0.35–0.80)</b> | <b>0.002</b> | 1.00 (ref)                 | 1.00 (0.79–1.26) | 0.96    |
| <b>Cardiovascular death</b>                    |                            |                         |              |                            |                  |         |
| No. of patients                                | 37                         | 18                      |              | 90                         | 78               |         |
| Event rate (per 1,000 person-year)             | 44.1                       | 21.9                    |              | 51.1                       | 42.4             |         |
| HR (95% CI)                                    | 1.00 (ref)                 | <b>0.49 (0.27–0.86)</b> | <b>0.01</b>  | 1.00 (ref)                 | 0.83 (0.61–1.12) | 0.23    |
| <b>Non-cardiovascular death</b>                |                            |                         |              |                            |                  |         |
| No. of patients                                | 29                         | 17                      |              | 49                         | 68               |         |
| Event rate (per 1,000 person-year)             | 34.6                       | 20.7                    |              | 27.8                       | 36.9             |         |
| HR (95% CI)                                    | 1.00 (ref)                 | 0.58 (0.32–1.07)        | 0.08         | 1.00 (ref)                 | 1.32 (0.91–1.90) | 0.13    |
| <b>Hospitalization for heart failure</b>       |                            |                         |              |                            |                  |         |
| No. of patients                                | 87                         | 65                      |              | 129                        | 134              |         |
| Event rate (per 1,000 person-year)             | 128.4                      | 91.2                    |              | 82.7                       | 72.5             |         |
| HR (95% CI)                                    | 1.00 (ref)                 | <b>0.72 (0.51–0.98)</b> | <b>0.04</b>  | 1.00 (ref)                 | 0.88 (0.68–1.13) | 0.30    |
| <b>Major cardiovascular events<sup>‡</sup></b> |                            |                         |              |                            |                  |         |
| No. of patients                                | 57                         | 37                      |              | 132                        | 115              |         |
| Event rate (per 1,000 person-year)             | 72.0                       | 46.5                    |              | 78.8                       | 64.5             |         |
| HR (95% CI)                                    | 1.00 (ref)                 | <b>0.65 (0.42–0.97)</b> | <b>0.03</b>  | 1.00 (ref)                 | 0.82 (0.64–1.05) | 0.11    |
| <b>Myocardial infarction</b>                   |                            |                         |              |                            |                  |         |
| No. of patients                                | 17                         | 14                      |              | 29                         | 34               |         |

|                                    |            |                  |      |            |                  |      |
|------------------------------------|------------|------------------|------|------------|------------------|------|
| Event rate (per 1,000 person-year) | 21.3       | 17.5             |      | 17.0       | 19.2             |      |
| HR (95% CI)                        | 1.00 (ref) | 0.83 (0.40–1.67) | 0.59 | 1.00 (ref) | 1.11 (0.68–1.84) | 0.65 |
| <b>Stroke</b>                      |            |                  |      |            |                  |      |
| No. of patients                    | 10         | 13               |      | 29         | 25               |      |
| Event rate (per 1,000 person-year) | 12.2       | 16.1             |      | 17.0       | 13.8             |      |
| HR (95% CI)                        | 1.00 (ref) | 1.33 (0.58–3.03) | 0.49 | 1.00 (ref) | 0.81 (0.47–1.38) | 0.43 |

\*Data are presented as number or hazard ratio (95% confidence interval). Bold font denotes significance.

†The primary outcome was a composite of cardiovascular death, aborted cardiac arrest, nonfatal myocardial infarction, nonfatal stroke, or hospitalization for the management of heart failure.

‡Major cardiovascular events included cardiovascular death, nonfatal myocardial infarction, and nonfatal stroke.

HFpEF, heart failure with preserved left ventricular ejection fraction; HR, hazard ratio; CI, confidence interval.

**Table S4. Spironolactone use and study discontinuation in HFpEF patients with or without resistant hypertension\*.**

|                                                                                           | Resistant hypertension (+) |                           |         | Resistant hypertension (-) |                             |         |
|-------------------------------------------------------------------------------------------|----------------------------|---------------------------|---------|----------------------------|-----------------------------|---------|
|                                                                                           | Placebo<br>n = 499         | Spironolactone<br>n = 505 | P value | Placebo<br>n = 1,221       | Spironolactone<br>n = 1,216 | P value |
| <b>Serum potassium <math>\geq 5.5</math> mmol/L on lowest spironolactone dose (15 mg)</b> |                            |                           |         |                            |                             |         |
| No. of patients                                                                           | 4                          | 40                        |         | 16                         | 62                          |         |
| Event rate (per 1,000 person-year)                                                        | 3.0                        | 30.0                      |         | 4.7                        | 19.6                        |         |
| HR (95% CI)                                                                               | 1.00 (ref)                 | 9.97 (3.57–27.88)         | <0.001  | 1.00 (ref)                 | 4.00 (2.31–6.94)            | <0.001  |
| <b>Serious hyperkalemia</b>                                                               |                            |                           |         |                            |                             |         |
| No. of patients                                                                           | 2                          | 17                        |         | 15                         | 29                          |         |
| Event rate (per 1,000 person-year)                                                        | 1.5                        | 12.7                      |         | 4.4                        | 9.2                         |         |
| HR (95% CI)                                                                               | 1.00 (ref)                 | 8.66 (2.00–37.50)         | 0.003   | 1.00 (ref)                 | 2.02 (1.08–3.77)            | 0.02    |
| <b>Breast tenderness or enlargement</b>                                                   |                            |                           |         |                            |                             |         |
| No. of patients                                                                           | 1                          | 9                         |         | 4                          | 34                          |         |
| Event rate (per 1,000 person-year)                                                        | 0.7                        | 6.7                       |         | 1.2                        | 10.7                        |         |
| HR (95% CI)                                                                               | 1.00 (ref)                 | 9.15 (1.16–72.23)         | 0.03    | 1.00 (ref)                 | 8.86 (3.14–24.97)           | 0.34    |
| <b>Anaphylactoid reaction or intolerance<sup>†</sup></b>                                  |                            |                           |         |                            |                             |         |
| No. of patients                                                                           | 2                          | 1                         |         | 8                          | 5                           |         |
| Event rate (per 1,000 person-year)                                                        | 1.5                        | 0.7                       |         | 2.4                        | 1.6                         |         |
| HR (95% CI)                                                                               | 1.00 (ref)                 | 0.49 (0.04–5.46)          | 0.56    | 1.00 (ref)                 | 0.63 (0.21–1.94)            | 0.42    |

\*Data are presented as number or hazard ratio (95% confidence interval). Serious hyperkalemia was defined as potassium  $\geq 6.0$  mmol/L based on a non-hemolyzed sample.

<sup>†</sup>None were anaphylactoid reaction.



**Figure S1. Mean systolic and diastolic blood pressure levels during follow-up in HFpEF patients with and without resistant hypertension.**

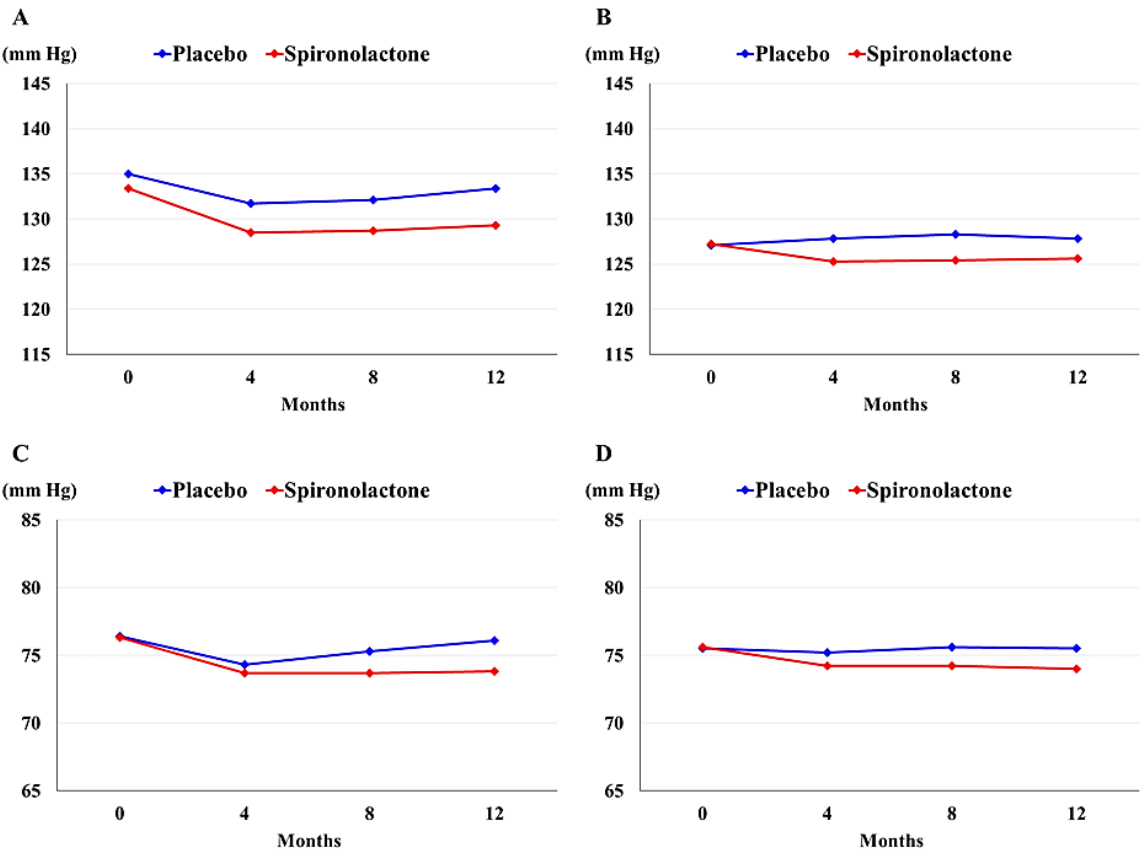

Mean systolic and diastolic blood pressure levels during follow-up in HFpEF patients, with (A and C) and without (B and D) resistant hypertension. HFpEF, heart failure with preserved ejection fraction.

**Figure S2. Kaplan–Meier survival curves for primary outcome in HFpEF patients with or without traditional resistant hypertension.**

**A. Primary outcome events in patients with resistant hypertension**

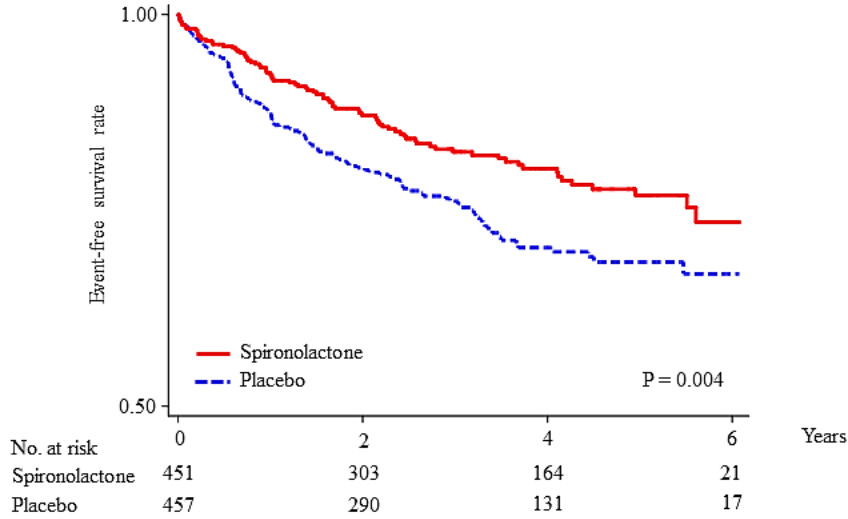

**B. Primary outcome events in patients without resistant hypertension**

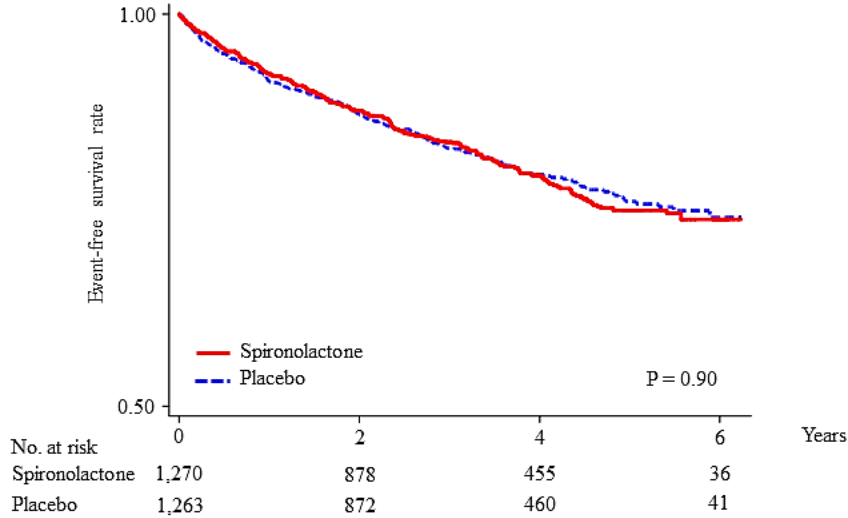

Rates of freedom from primary outcome events in HFpEF patients, with (A) and without (B) traditional resistant hypertension. The primary outcome was a composite of cardiovascular death, aborted cardiac arrest, or hospitalization for heart failure. HFpEF, heart failure with preserved ejection fraction.

**Supplemental Figure 3. Kaplan–Meier survival curves for all-cause death and heart failure hospitalization in HFpEF patients with or without traditional resistant hypertension.**

**A. All-cause death in patients with resistant hypertension**

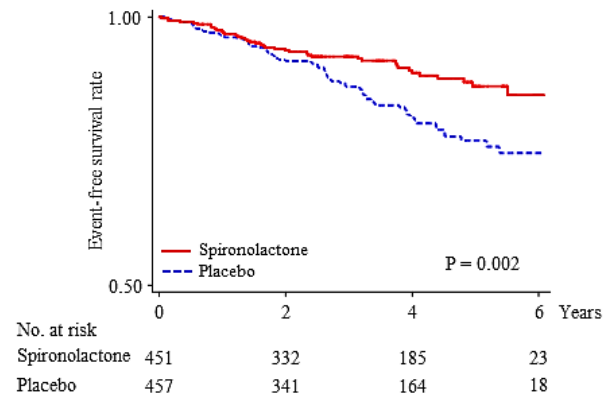

**B. Hospitalization for HF in patients with resistant hypertension**

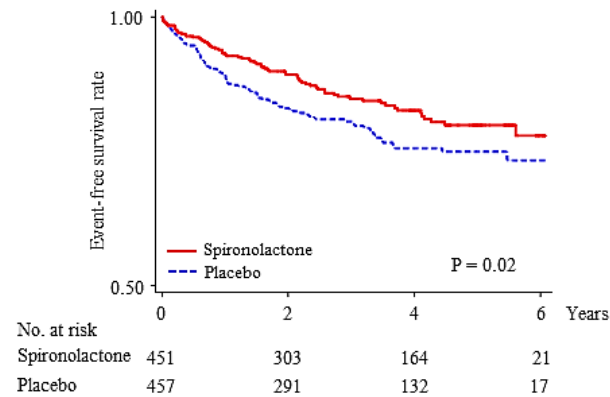

**C. All-cause death in patients without resistant hypertension**

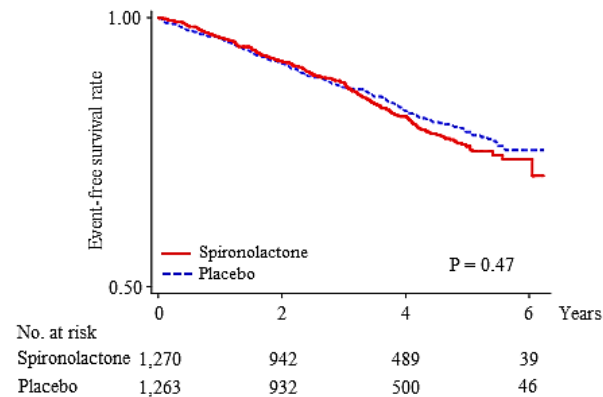

**D. Hospitalization for HF in patients without resistant hypertension**

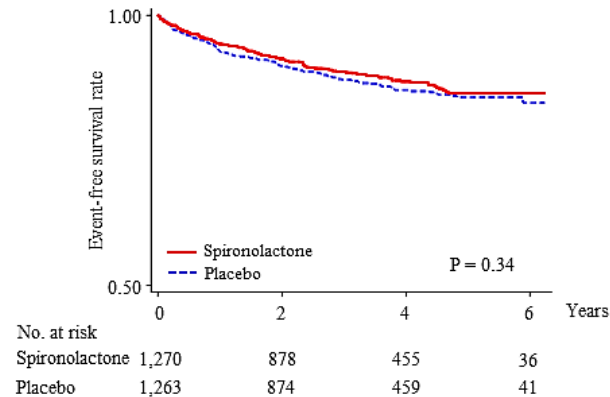

Rates of freedom from all-cause death (A and C) and hospitalization for heart failure (B and D). HFpEF, heart failure with preserved ejection fraction; HF, heart failure.

**Figure S4. Kaplan–Meier survival curves for primary outcome in HFpEF patients from the Americas with or without resistant hypertension.**

**A. Primary outcome in patients from the Americas with resistant hypertension**

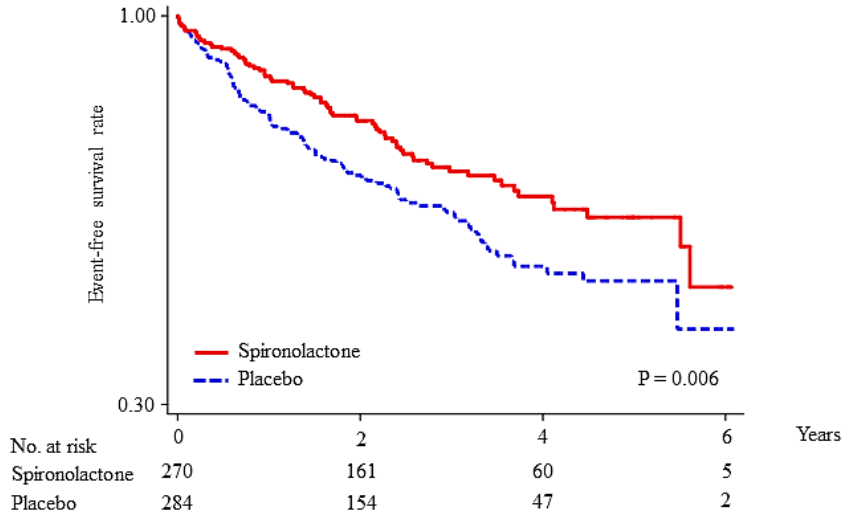

**B. Primary outcome in patients from the Americas without resistant hypertension**

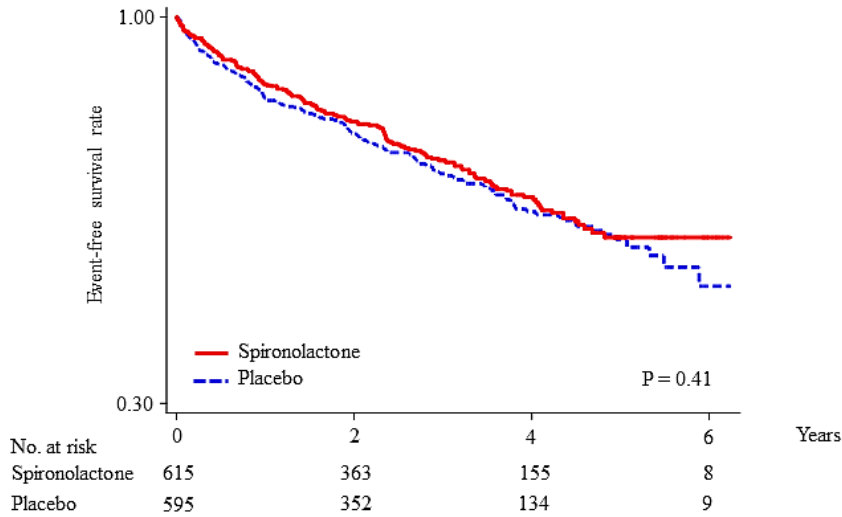

Rates of freedom from primary outcome events in HFpEF patients from Americas, with (A) and without (B) resistant hypertension. The primary outcome was a composite of cardiovascular death, aborted cardiac arrest, or hospitalization for heart failure. HFpEF, heart failure with preserved ejection fraction.

**Figure S5. Kaplan–Meier survival curves for all-cause death and heart failure hospitalization in HFpEF patients from the Americas with or without resistant hypertension.**

**A. All-cause death in patients with resistant hypertension**

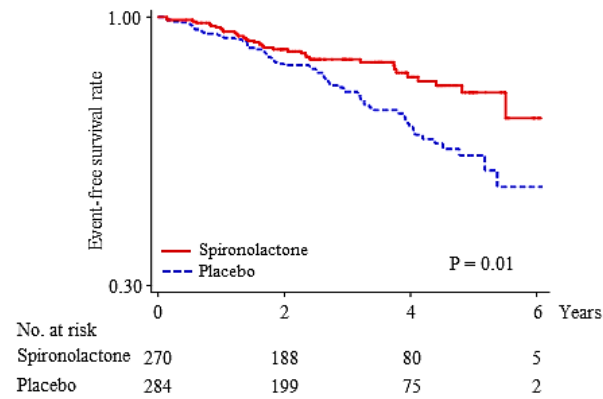

**B. Hospitalization for HF in patients with resistant hypertension**

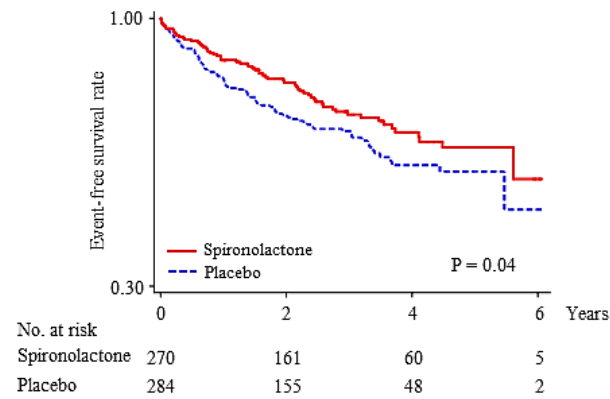

**C. All-cause death in patients without resistant hypertension**

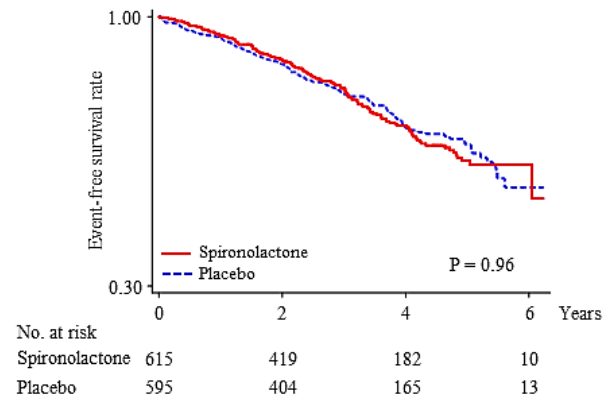

**D. Hospitalization for HF in patients without resistant hypertension**

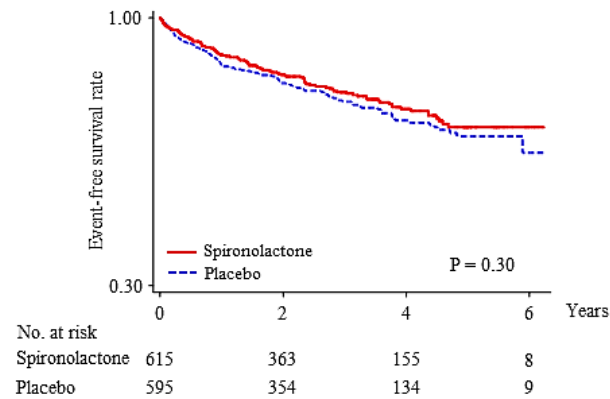

Rates of freedom from all-cause death (A and C) and hospitalization for heart failure (B and D). HFpEF, heart failure with preserved ejection fraction; HF, heart failure.
